# Supplementary material for: Anti-Influenza with Green Tea Catechins: A Systematic Review and Meta-Analysis
Source: MDPI journal article supplement (doi:10.3390/molecules26134014), 2021-06-30
Supplement: s1 [file s1]

**Table S1. Event of type of influenza virus infection and EGCG consumption concentrations**

| Authors (year)              | Type of influenza virus |    |         |        | EGCG (mg/day) |      |
|-----------------------------|-------------------------|----|---------|--------|---------------|------|
|                             | A                       | B  | A and B | A or B | ≤ 338         | >338 |
| Yamada et al (2006) [37]    | 0                       | 6  | 0       | 0      | 76            | 0    |
| Rowe et al (2007) [32]      | 0                       | 0  | 0       | 53     | 0             | 53   |
| Yamada et al (2007) [33]    | 6                       | 0  | 0       | 0      | 395           | 0    |
| Matsumoto et al (2011) [34] | 6                       | 11 | 0       | 0      | 97            | 0    |
| Park et al (2011) [38]      | 185                     | 18 | 1       | 0      | 1954          | 0    |
| Toyoizumi et al (2013) [35] | 0                       | 0  | 0       | 23     | 155           | 0    |
| Ide et al (2014) [36]       | 42                      | 2  | 0       | 0      | 384           | 0    |
| Delabre et al (2015) [39]   | 44                      | 37 | 8       | 0      | 193           | 0    |

Abbreviations: EGCG, Epigallocatechin gallate.
