# Supplementary material for: Anti-Influenza with Green Tea Catechins: A Systematic Review and Meta-Analysis
Source: MDPI journal article supplement (doi:10.3390/molecules26134014), 2021-06-30
Supplement: s1 [file s1]

**Table S2** The Risk Of Bias In Non-randomized Studies of Interventions (ROBINS-I) tool

|              | Confounding domain | Selection of participants into the study | Classification of interventions | Deviation from intended interventions | Missing data | Measurement of outcomes | Election of reported result | Overall quality |
|--------------|--------------------|------------------------------------------|---------------------------------|---------------------------------------|--------------|-------------------------|-----------------------------|-----------------|
| Yamada 2006  | M                  | L                                        | L                               | N                                     | N            | L                       | L                           | M               |
| Park 2011    | M                  | L                                        | L                               | S                                     | N            | S                       | L                           | S               |
| Delabre 2014 | M                  | L                                        | L                               | L                                     | C            | L                       | L                           | C               |

Critical
Serious
Moderate
Low
No information
